# Supplementary material for: A doubly cross-linked nano-adhesive for the reliable sealing of flexible microfluidic devices
Source: Royal Society of Chemistry journal article supplement (doi:10.1039/c2lc41266g), 2013-01-01
Supplement: c2lc41266g.pdf [file c2lc41266g.pdf]

## Electronic Supplementary Information

### A Doubly Cross-linked Nano-adhesive For the Reliable Sealing of Flexible Microfluidic Devices

Jae Bem You, Kyoung-Ik Min, Bora Lee, Dong-Pyo Kim, Sung Gap Im

**Figure 1S.** XPS C1s high resolution scan for PGMA (top) and PGMA reacted with EDA (bottom).

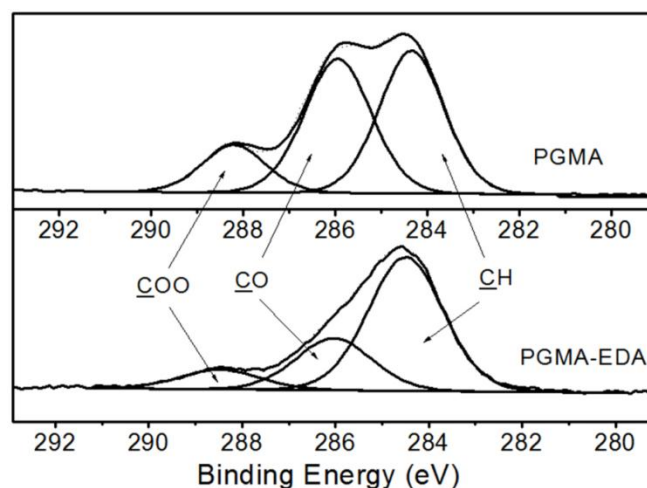

**Table 1S.** Burst pressures obtained from different bonding methods reported in the literature.

| Bonding Method                    | Sample     | Channel dimensions ( $\mu\text{m}$ ) | Maximum Burst Pressure (kPa) | Reference                                          |
|-----------------------------------|------------|--------------------------------------|------------------------------|----------------------------------------------------|
| DCNA                              | PET/glass  | W: 100<br>H: 50                      | 11700                        | -                                                  |
| iCVD deposition                   | PDMS/glass | W: 400<br>H: 150                     | >1035                        | <i>Chem. Mater.</i> <b>2010</b> , <i>22</i> , 1732 |
| APTES and GPTES-assisted bonding  | PDMS/U-PET | W: 500<br>H: 150                     | >607                         | <i>Lab Chip</i> <b>2010</b> , <i>10</i> , 1274     |
| APTES-assisted bonding            | PDMS/PC    | W: 600<br>H: 45                      | >528                         | <i>Lab Chip</i> <b>2011</b> , <i>11</i> , 962      |
| PDMS-assisted interfacial bonding | PDMS/PET   | -                                    | 400                          | <i>Adv. Mater.</i> <b>2011</b> , <i>23</i> , 5551  |
| PU bonding (dry and wet)          | PU/PU      | W: 150<br>H: 10                      | 326.4 $\pm$ 19.6             | <i>Lab Chip</i> <b>2012</b> , <i>12</i> , 960      |

**Movie 1S.** Movie showing a PET/PET microfluidic device completely folded. As shown, the device operates well even when it is completely folded.

**Movie 2S.** Movie showing a PDMS/PET microfluidic device rolled and fastened around a pen. As shown, the device operates well without any delamination.
